# Supplementary material for: Presynaptic NMDA receptors facilitate short-term plasticity and BDNF release at hippocampal mossy fiber synapses
Source: eLife. 2021 Jun 1;10:e66612. doi: 10.7554/eLife.66612 (PMC8186907; doi:10.7554/eLife.66612)
Supplement: Source data 1. [file elife-66612-data1.xlsx]

## Sheet: Figure 1
Figure 1D						Figure 1E				Figure 1F				Figure 1G
Top						Baseline	MK-801			Baseline	D-APV/R-CPP			Baseline	MK-801
		CA3				618.232	445.123			344.149	297.67			179.188	145.493
PERCENTAGE		MF	%			175.272	108.852			616.695	463.079			459.718	319.824
	150-120	0	0			539.49	367.696			631.94	325.745			364.158	196.715
	120-90	2	0.628931			248.231	126.375			666	572.773			257.94	169.473
	90-60	4	1.25786			212.715	119.43			645.338	358.469			396.494	287.999
	60-30	28	8.80503			425.773	307.103			380.976	338.291			212.104	151.731
	30-0	100	31.4465			271.136	228.246			541.326	304.694			152.745	110.975
	0-30	136	42.7673			166.531	104.729							202.586	174.823
	30-60	30	9.43396			535.485	397.654
	60-90	12	3.77358			582.936	493.435
	90-120	4	1.25786
	120-150	2	0.628931
		318	100
Bottom
		CA3
PERCENTAGE		AC
	150-120	0	0
	120-90	0	0
	90-60	2	0.869565
	60-30	8	3.47826
	30-0	24	10.4348
	0-30	158	68.6957
	30-60	28	12.1739
	60-90	8	3.47826
	90-120	2	0.869565
	120-150	0	0
		230	100

## Sheet: Figure 1-figure supplement 1
Figure 1-FS1C
PERCENTAGE	mf	ac
150-120	0	0
120-90	0	0
90-60	0	0
60-30	1.30719	0.64935
30-0	5.22876	3.8961
0-30	44.4444	50.6493
30-60	37.2549	33.7662
60-90	7.84314	6.49351
90-120	2.61438	3.24675
120-150	1.30719	1.2987

## Sheet: Figure 1-figure supplement 2
Figure 1-FS2A				Figure 1-FS2B
Baseline	Naïve			Baseline	Naïve
203.109	262.635			247.675	253.425
188.264	187.853			228.802	249.14
561.565	578.843			287.418	313.442
258.932	271.136			272.916	314.663
522.006	702.397			261.827	263.333
170.632	218.626			189.202	204.335
153.187	133.572			258.149	273.701
189.358	230.04			198.843	187.733
691.7	511.615			522.39	440.196
415.108	535.485

## Sheet: Figure 1-figure supplement 3
Figure3-FS1
iMK801	Naïve+MK-801
4.04928	3.47272
1.41306	2.97704
3.6917	3.61328
1.96052	1.3514
5.28971	4.23572

## Sheet: Figure 2
Figure 2C			Figure 2D
Control	cKO		Control	cKO
1.66977	0.02745		829.243	304.142
2.71193	0.36775		566.093	176.647
1.1759	0.03965		375.655	279.349
1.79745	0.03587		204.345	378.01
1.35157	0.16985		693.469	237.526
0.80481	0.27288		237.024	109.502
2.38238	0.28507		517.215	252.282
1.67313	0.04632		287.699	369.708
1.07809	0.34997		391.305	273.612
	0.24158		359.784	408.352
			491.2	321.987
			345.763
			289.526

## Sheet: Figure 3
Figure 3A				Figure 3B				Figure 3C				Figure 3D
Baseline	MK-801			Baseline	Naïve			Baseline	D-APV Puff			Baseline	Naïve
188.317	135.048			166.548	188.317			266.95	200.881			226.336	223.881
248.529	196.474			179.858	203.573			208.495	172.243			223.418	197.503
239.237	181.49			246.165	224.605			308.618	222.672			153.504	173.91
197.191	183.275			191.593	183			185.525	172.532			203.219	204.03
193.402	160.802			175.572	184.578			205.58	170.973			239.582	214.974
216.966	205.214			191.687	182.481			188.682	158.678			181.511	231.633
183.127	161.633			153.728	207.133			176.435	135.67			243.359	245.442
239.122	224.911			185.538	195.6

## Sheet: Figure 3-figure supplement 1
Figure3-FS1B						Figure-FS1C
Baseline 2 min before puff	SEM	D-APV Puff-2 min	SEM			LFF 2 min before	SEM	LFF+Puff 2 min	SEM
98.791	1.71153	20.168	1.27254			123.848	4.63725	129.992	9.527

## Sheet: Figure 4
Figure 4C				Figure 4D				Figure 4E				Figure 4F				Figure 4G
Control	cKO			Baseline	MK-801			Baseline	Naïve			Baseline	MK-801			Baseline	Naïve
255.008	148.837			577.642	448.932			285.022	222.552			1.21429	0.85714			0.88235	1.11765
229.296	172.514			725.89	525.473			412.925	429.584			1.55	0.5			0.82353	1
294.026	174.717			180.492	168.873			640.148	646.92			1	0.47619			0.68182	0.63636
201.732	220.944			597.223	361.432			447.872	464.192			0.66667	0.42857			0.65	0.5
230.711	283.23			277.987	233.442			395.9	399.095			0.44444	0.27778			0.52381	0.90476
363.712	291.955			356.452	259.649			341.968	349.332			0.71429	0.2381			1	1.09524
342.424	191.09			440	345.833			325.818	309.933
189.132	161.172			394.118	364.286			325.563	326.624
190.703	159.397			1052.63	821.429			152.518	156.169
	170.35			1000	835.294
	167.636			234.286	150
	106.211			1371.43	1047.37

## Sheet: Figure 4-figure supplement 1
Figure 4-FS1A				Figure 4-FS1B
Baseline	MK-801			Baseline	Naïve
511.667	390.526			660.878	670.833
658.084	511.439			336.219	308.906
243.115	181.314			475.439	506.618
423.385	371.636			520.213	590.249
280	191.4			318.653	329.623
581.25	549.257

## Sheet: Figure 4-figure supplement 2
Figure 4-FS2A				Figure 4-FS2B
Baseline	MK-801			Baseline	Naïve
1.33333	0.85714			1.77778	1.55556
2.7381	2.14286			1	1.09091
2.7619	2.52381			1.33333	1.25
3	2.13333			1.28571	1.52381
2.04762	1.61905			1.25	1.5
2.95238	2.14286			2.64286	2.71429

[truncated: 11 more sheets: Figure 4-figure supplement 3, Figure 5, Figure 5-figure supplement 1, Figure 6, Figure 6-figure supplement 1, Figure 6-figure supplement 2, Figure 6-figure supplement 3, Figure 7, Figure 7-figure supplement 1, Figure 8 , Figure 8-figure supplement 1]
