# Supplementary figures and images for: Presynaptic NMDA receptors facilitate short-term plasticity and BDNF release at hippocampal mossy fiber synapses
Source: eLife journal article supplement (doi:10.7554/elife.66612), 2021-06-01

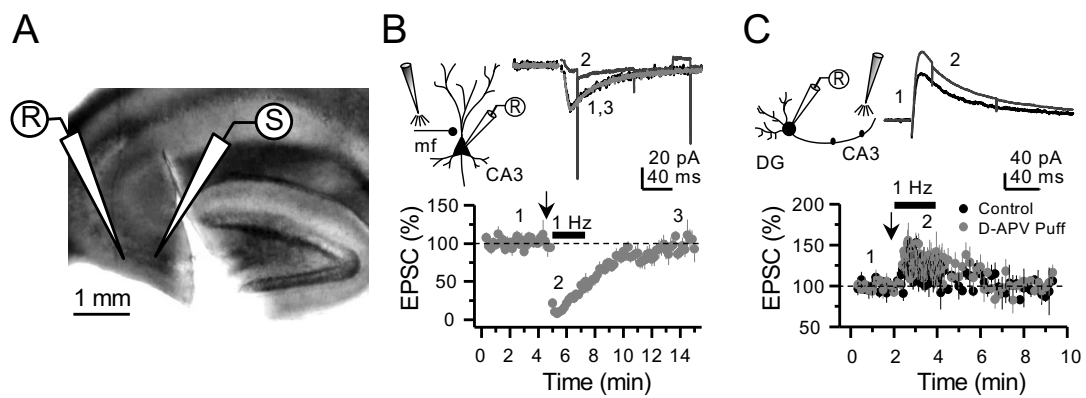

**Figure 3-figure supplement 1**

Supplement: supp [file elife-66612-supp-v1.zip]

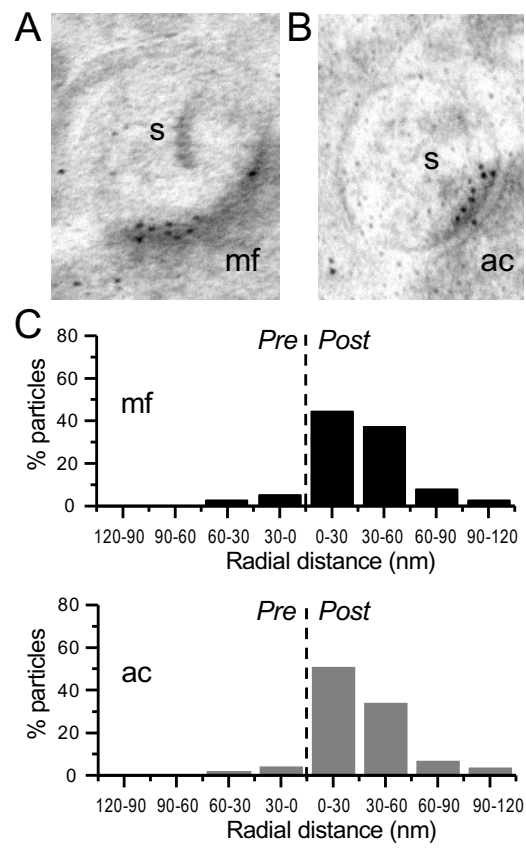

**Figure 1-figure supplement 1**

Supplement: supp [file elife-66612-supp-v1.zip]

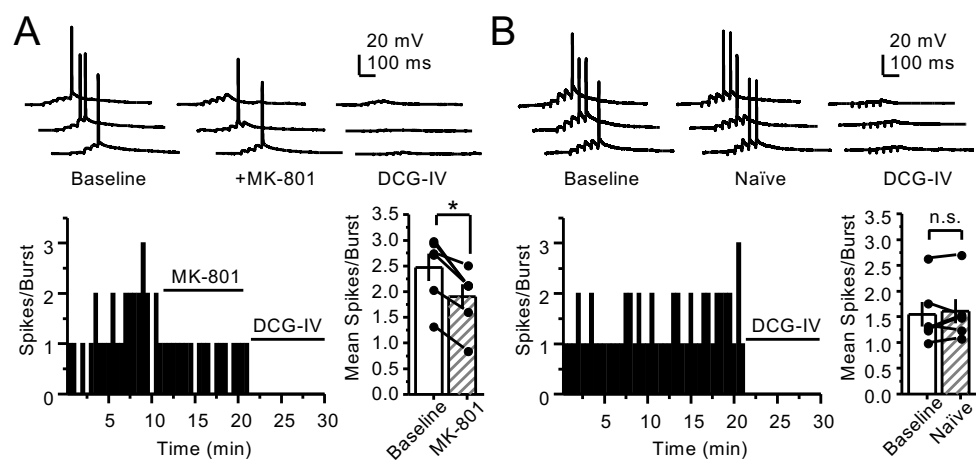

**Figure 4-figure supplement 2**

Supplement: supp [file elife-66612-supp-v1.zip]

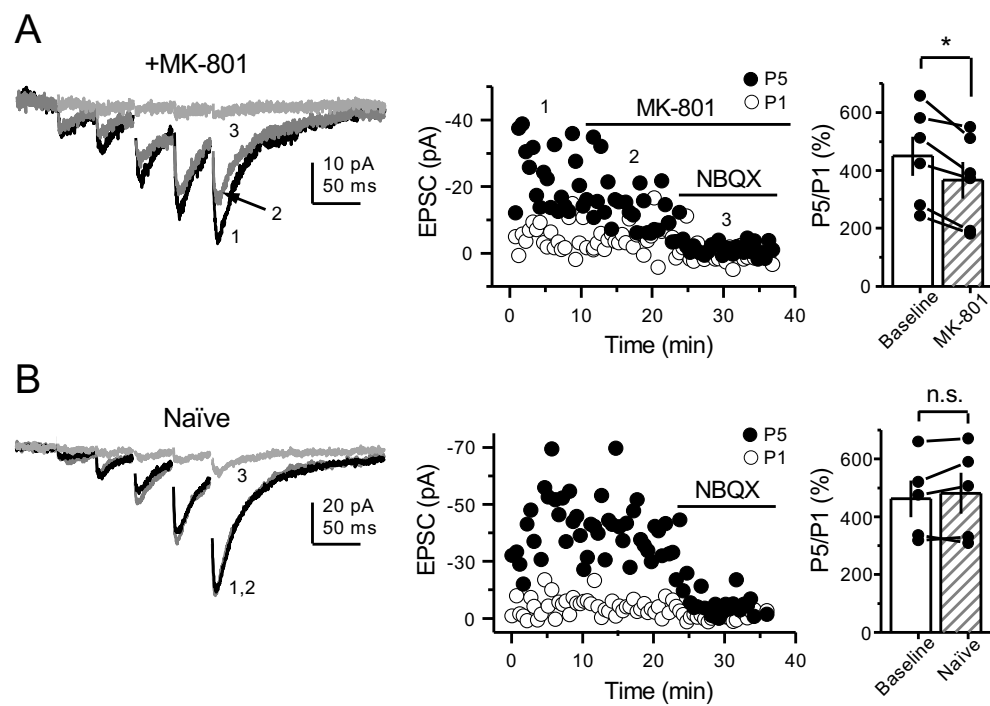

**Figure 4-figure supplement 1**

Supplement: supp [file elife-66612-supp-v1.zip]

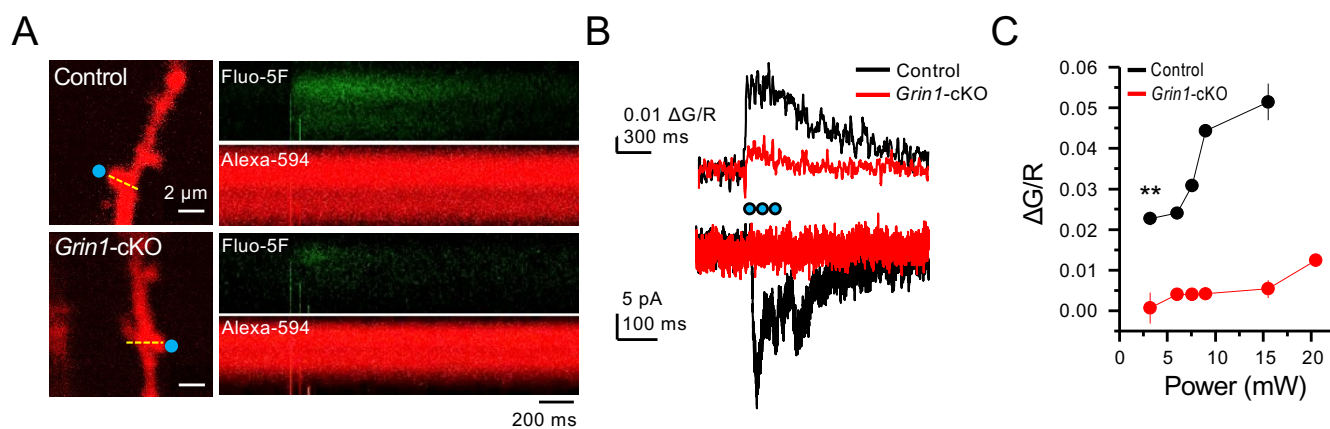

Figure 6-figure supplement 1

Supplement: supp [file elife-66612-supp-v1.zip]

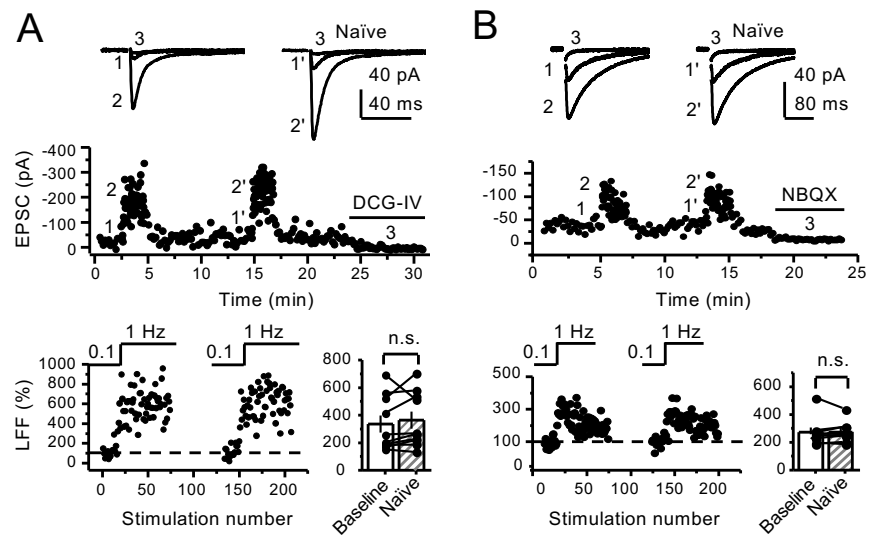

**Figure 1-figure supplement 2**

Supplement: supp [file elife-66612-supp-v1.zip]

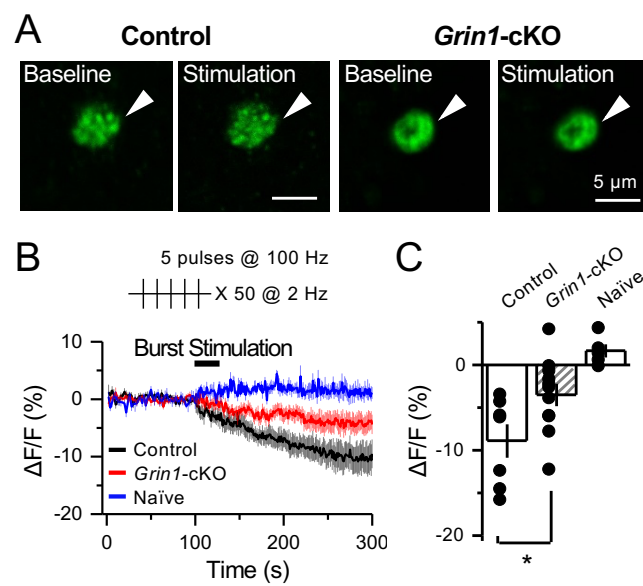

**Figure 7-figure supplement 1**

Supplement: supp [file elife-66612-supp-v1.zip]

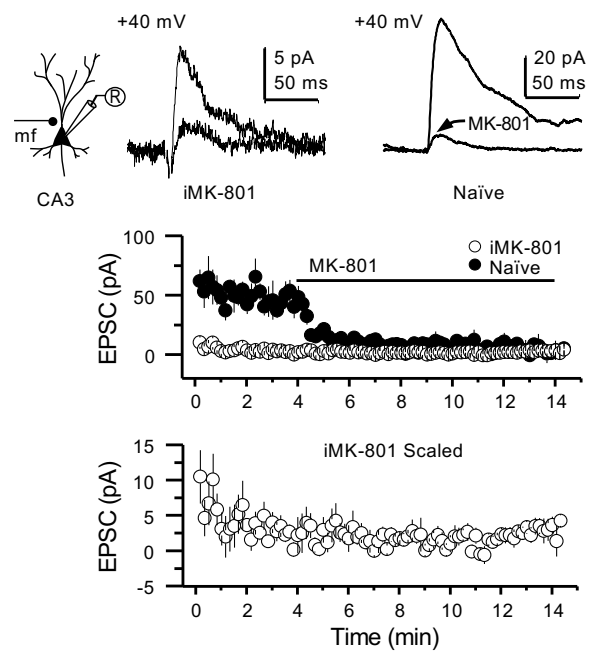

**Figure 1-figure supplement 3**

Supplement: supp [file elife-66612-supp-v1.zip]

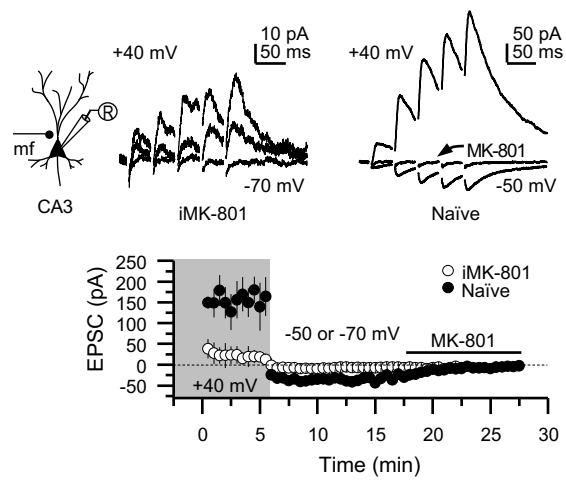

**Figure 4-figure supplement 3**

Supplement: supp [file elife-66612-supp-v1.zip]

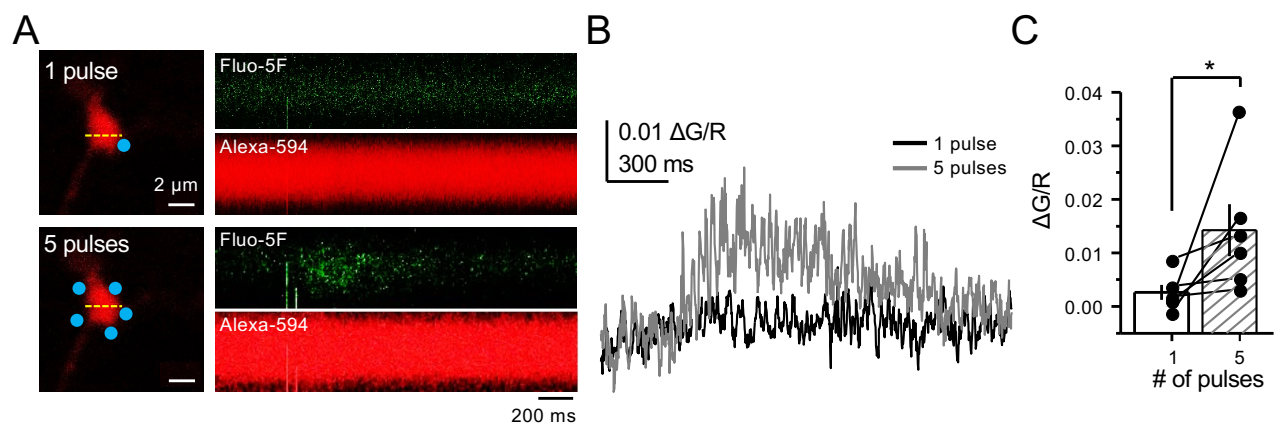

Figure 6-figure supplement 2

Supplement: supp [file elife-66612-supp-v1.zip]

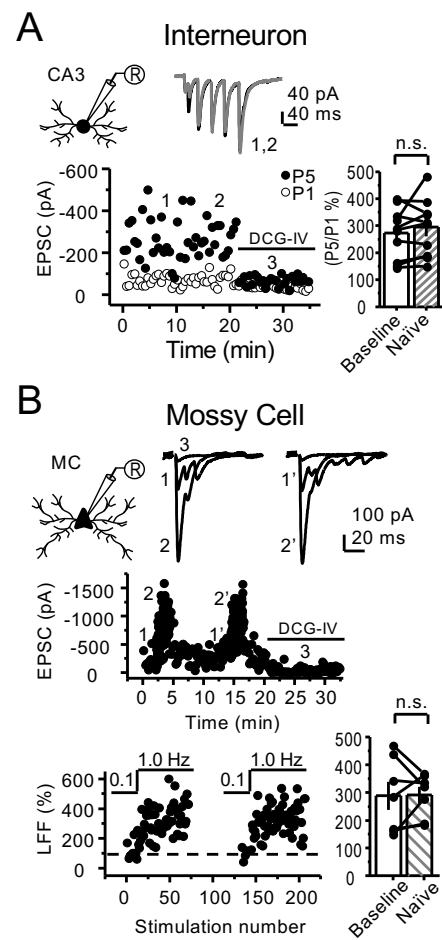

**Figure 8-figure supplement 1**

Supplement: supp [file elife-66612-supp-v1.zip]

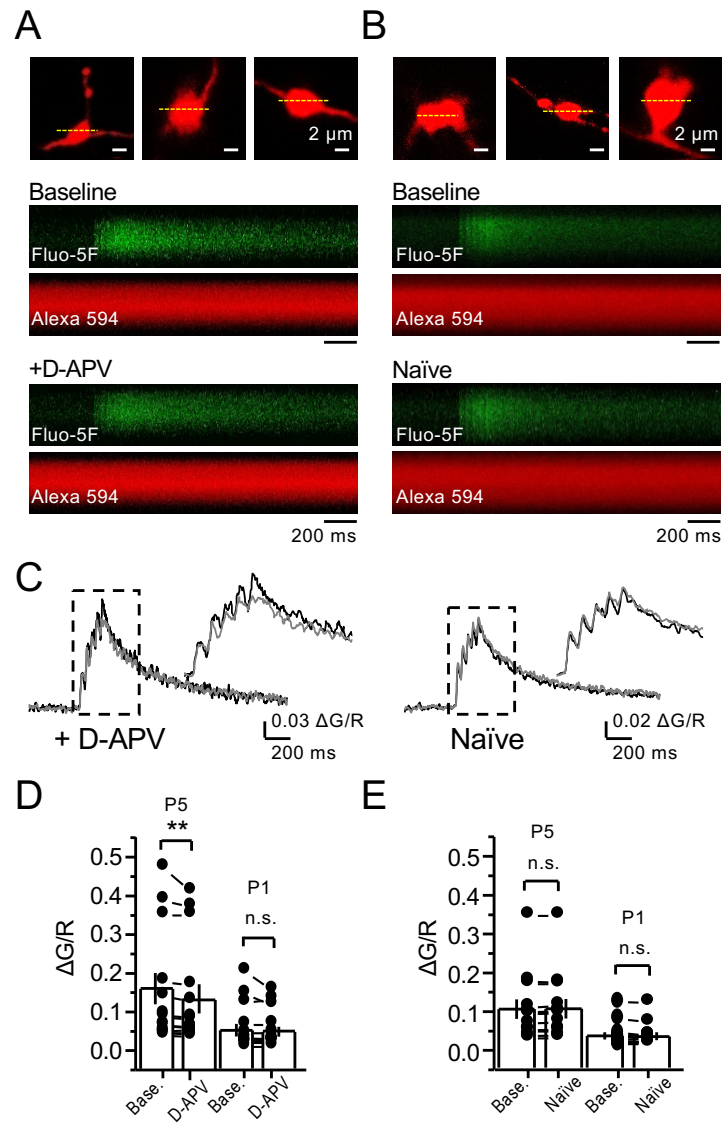

**Figure 5-figure supplement 1**

Supplement: supp [file elife-66612-supp-v1.zip]

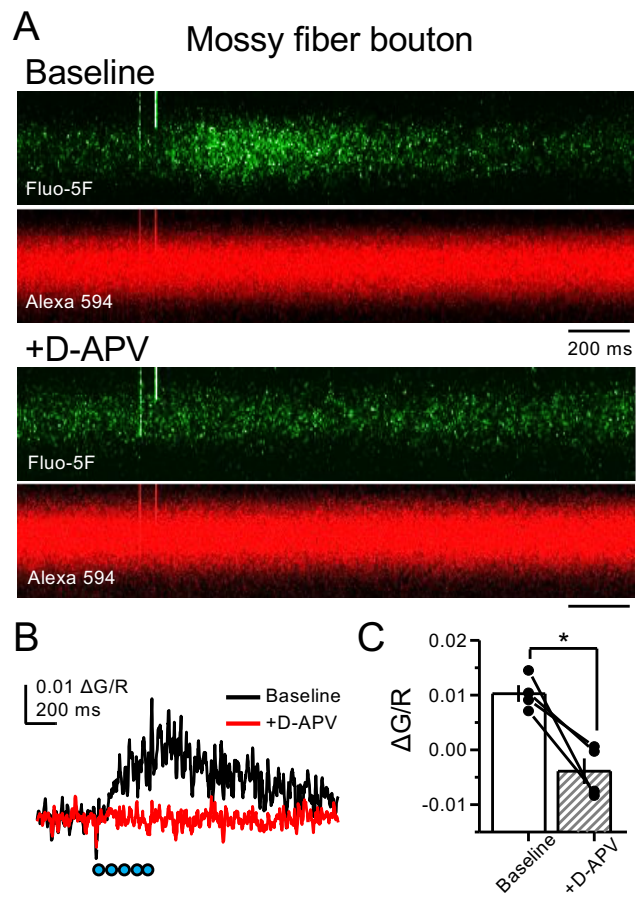

Figure 6-figure supplement 3

Supplement: supp [file elife-66612-supp-v1.zip]
